# Supplementary material for: Vitamin B12 and folate concentrations during pregnancy and insulin resistance in the offspring: the Pune Maternal Nutrition Study
Source: Springer Nature journal article supplement (doi:10.1007/s00125-007-0793-y), 2007-09-12
Supplement: MOESM1 [file 8087206]

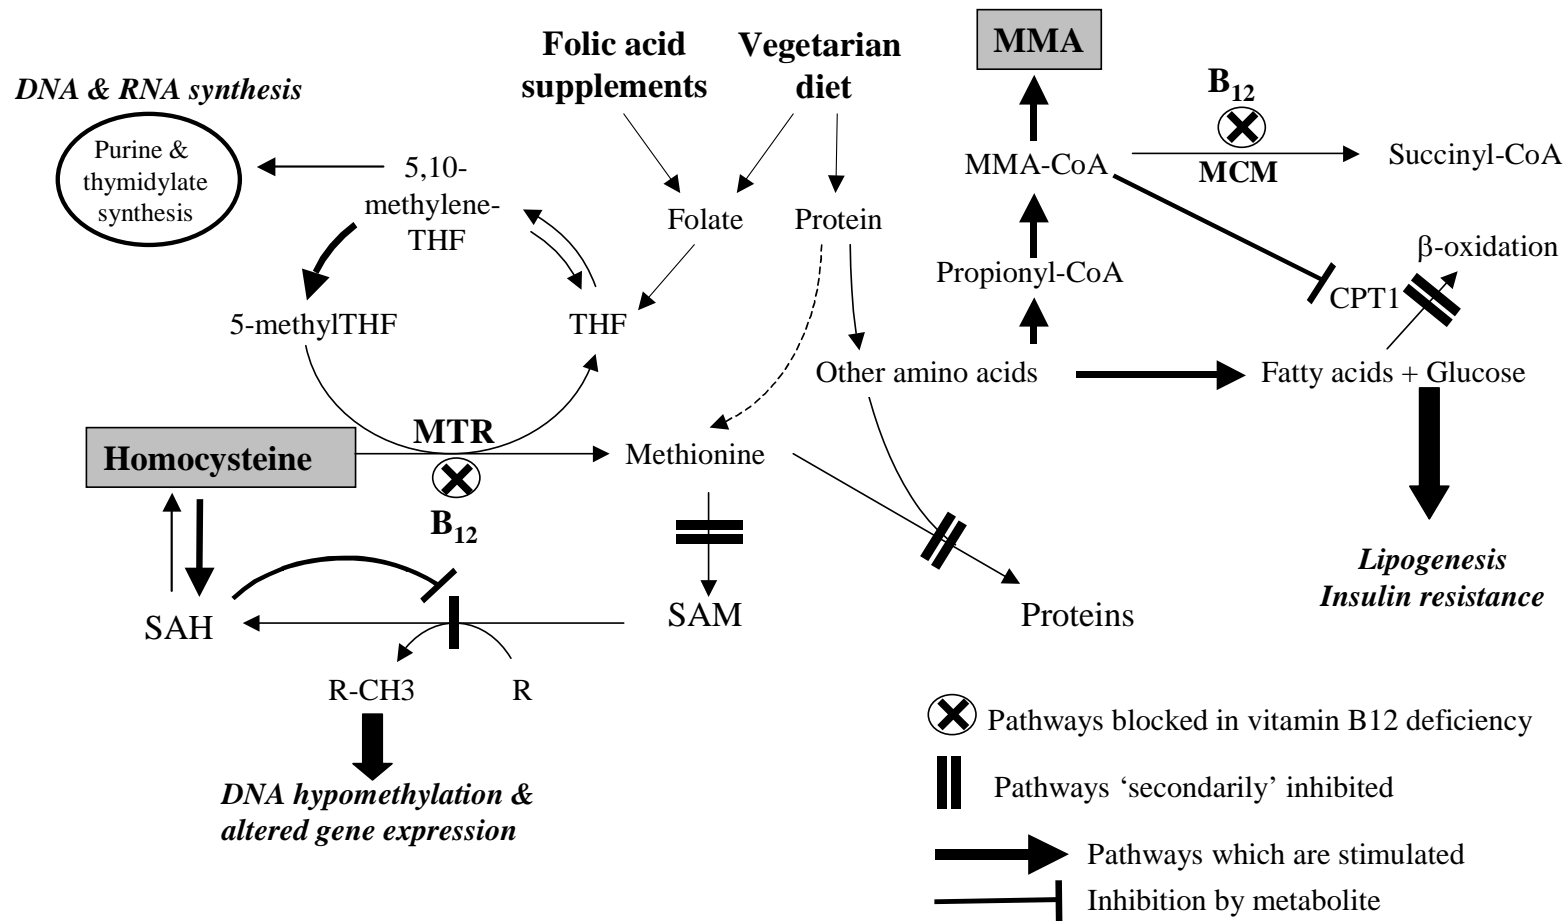

|         |                                |                   |                        |
|---------|--------------------------------|-------------------|------------------------|
| CPT1    | Carnitine palmitoyltransferase | R-CH <sub>3</sub> | Methylated compound    |
| MCM     | Methylmalonyl-CoA mutase       | SAH               | S-adenosylhomocysteine |
| MMA-CoA | Methylmalonyl-CoA              | SAM               | S-adenosylmethionine   |
| MTR     | Methionine synthase            | THF               | Tetrahydrofolate       |
| R       | Methyl acceptor                |                   |                        |

**ESM Fig. 1 Suggested metabolic mechanisms for adiposity, insulin resistance and altered gene expression in a situation of dietary vitamin B<sub>12</sub> deficiency combined with adequate folate status**
