# Supplementary material for: Vitamin B12 and folate concentrations during pregnancy and insulin resistance in the offspring: the Pune Maternal Nutrition Study
Source: Springer Nature journal article supplement (doi:10.1007/s00125-007-0793-y), 2007-09-12
Supplement: MOESM2 [file 8087206]

## Electronic supplementary material

**ESM Table 1** Unrotated factor loadings from the PCA

| Variable                                    | Factor 1               | Factor 2                     | Factor 3                               |
|---------------------------------------------|------------------------|------------------------------|----------------------------------------|
| Mother's pre-pregnant size                  |                        |                              |                                        |
| Height                                      | 0.30                   | 0.78                         | –                                      |
| Head size                                   | 0.38                   | 0.60                         | –                                      |
| Mid-arm size                                | 0.83                   | –0.07                        | –                                      |
| Subscapular skinfold thickness              | 0.82                   | –0.25                        | –                                      |
| Triceps skinfold thickness                  | 0.83                   | –0.29                        | –                                      |
| Waist                                       | 0.76                   | –0.03                        | –                                      |
| Hip                                         | 0.81                   | 0.07                         | –                                      |
| Interpretation                              | Greater overall size   | Taller, less adipose         |                                        |
| Maternal macronutrient intake               |                        |                              |                                        |
| 18 week energy                              | 0.82                   | 0.55                         | –0.10                                  |
| 28 week energy                              | 0.82                   | –0.55                        | –0.07                                  |
| 18 week protein                             | 0.80                   | 0.54                         | –0.00                                  |
| 28 week protein                             | 0.80                   | –0.54                        | –0.00                                  |
| 18 week fat                                 | 0.70                   | 0.47                         | 0.42                                   |
| 28 week fat                                 | 0.73                   | –0.46                        | 0.35                                   |
| 18 week carbohydrate                        | 0.77                   | 0.52                         | –0.29                                  |
| 28 week carbohydrate                        | 0.77                   | –0.52                        | –0.24                                  |
| Interpretation                              | Greater overall intake | More at 18 weeks, less at 28 | More fat, less carbohydrate            |
| Maternal intake of micronutrient-rich foods |                        |                              |                                        |
| 18 week GLVs                                | 0.49                   | –0.09                        | –0.39                                  |
| 28 week GLVs                                | 0.48                   | 0.15                         | –0.44                                  |
| 18 week fruit                               | 0.64                   | 0.08                         | –0.21                                  |
| 28 week fruit                               | 0.69                   | 0.17                         | –0.32                                  |
| 18 week non-veg                             | 0.57                   | –0.60                        | 0.36                                   |
| 28 week non-veg                             | 0.57                   | –0.59                        | 0.35                                   |
| 18 week dairy                               | 0.42                   | 0.58                         | 0.46                                   |
| 28 week dairy                               | 0.39                   | 0.64                         | 0.40                                   |
| Interpretation                              | Greater overall intake | More dairy, less non-veg     | More dairy and non-veg, less GLV/fruit |

|                                  |                                                    |                                          |                                           |
|----------------------------------|----------------------------------------------------|------------------------------------------|-------------------------------------------|
| Maternal micronutrient status    |                                                    |                                          |                                           |
| 18 week vitamin B <sub>12</sub>  | -0.21                                              | 0.29                                     | -0.32                                     |
| 28 week vitamin B <sub>12</sub>  | -0.19                                              | 0.38                                     | -0.26                                     |
| 18 week folate                   | -0.16                                              | -0.07                                    | 0.55                                      |
| 28 week folate                   | -0.21                                              | -0.07                                    | 0.50                                      |
| 18 week MMA                      | 0.22                                               | 0.50                                     | 0.24                                      |
| 28 week MMA                      | 0.22                                               | 0.48                                     | 0.25                                      |
| 18 week tHcy                     | 0.22                                               | -0.24                                    | -0.01                                     |
| 28 week tHcy                     | 0.25                                               | -0.20                                    | -0.12                                     |
| Interpretation                   | More B <sub>12</sub> and folate; less tHcy and MMA | More MMA and B <sub>12</sub> , less tHcy | More folate and MMA, less B <sub>12</sub> |
| Newborn size                     |                                                    |                                          |                                           |
| Weight                           | 0.91                                               | -0.12                                    | -                                         |
| Length                           | 0.70                                               | -0.42                                    | -                                         |
| Head size                        | 0.72                                               | -0.34                                    | -                                         |
| Abdominal size                   | 0.82                                               | -0.07                                    | -                                         |
| Mid-arm size                     | 0.81                                               | -0.19                                    | -                                         |
| Subscapular skinfold thickness   | 0.72                                               | 0.60                                     | -                                         |
| Triceps skinfold thickness       | 0.73                                               | 0.58                                     | -                                         |
| Interpretation                   | Greater overall size                               | Shorter, more adipose <sup>a</sup>       |                                           |
| 6 year size and body composition |                                                    |                                          |                                           |
| Lean mass                        | 0.51                                               | 0.77                                     | -                                         |
| Fat mass in legs                 | 0.86                                               | -0.46                                    | -                                         |
| Fat mass in trunk                | 0.84                                               | -0.48                                    | -                                         |
| Height                           | 0.67                                               | 0.61                                     | -                                         |
| Interpretation                   | Greater overall size, more adipose                 | Taller, more muscular, less adipose      |                                           |

Newborn and 6 year body size and body composition variables were first adjusted for gestation and age, respectively

Variables were transformed to normality where appropriate; where a reciprocal transformation was used, the sign of the correlation given in the table has been reversed so as to agree with the direction of the association had the variable been untransformed

<sup>a</sup> In Fig. 3 in the main text, newborn Factor 2 (F2, 'shorter, more adipose') has been changed to 'longer, less adipose', and the direction of the significant associations reversed accordingly, to make interpretation of the figure easier
